# Supplementary material for: BAM1/2 receptor kinase signaling drives CLE peptide-mediated formative cell divisions in Arabidopsis roots
Source: PubMed Central journal article supplement (PMC7768756; doi:10.1073/pnas.2018565117), 2020-12-07
Supplement: pnas.2018565117.sapp.pdf [file pnas.2018565117.sapp.pdf]

# PNAS

[www.pnas.org](http://www.pnas.org)

Supplementary Information for

BAM1/2 receptor kinase signaling drives CLE-peptide mediated formative cell divisions in Arabidopsis roots

Ashley D. Crook<sup>a,1</sup>, Andrew C. Willoughby<sup>a,1</sup>, Ora Hazak<sup>b,2</sup>, Satoshi Okuda<sup>c,3</sup>, Kylie R. VanDerMolen<sup>a</sup>, Cara L. Soyars<sup>a</sup>, Pietro Cattaneo<sup>b</sup>, Natalie M. Clark<sup>d</sup>, Rosangela Sozzani<sup>d</sup>, Michael Hothorn<sup>c</sup>, Christian S. Hardtke<sup>b</sup>, and Zachary L. Nimchuk<sup>a,e,4</sup>.

Corresponding author: Zachary L. Nimchuk

Email: [zackn@email.unc.edu](mailto:zackn@email.unc.edu)

**This PDF file includes:**

Figures S1 to S3  
Tables S1 to S3  
SI References

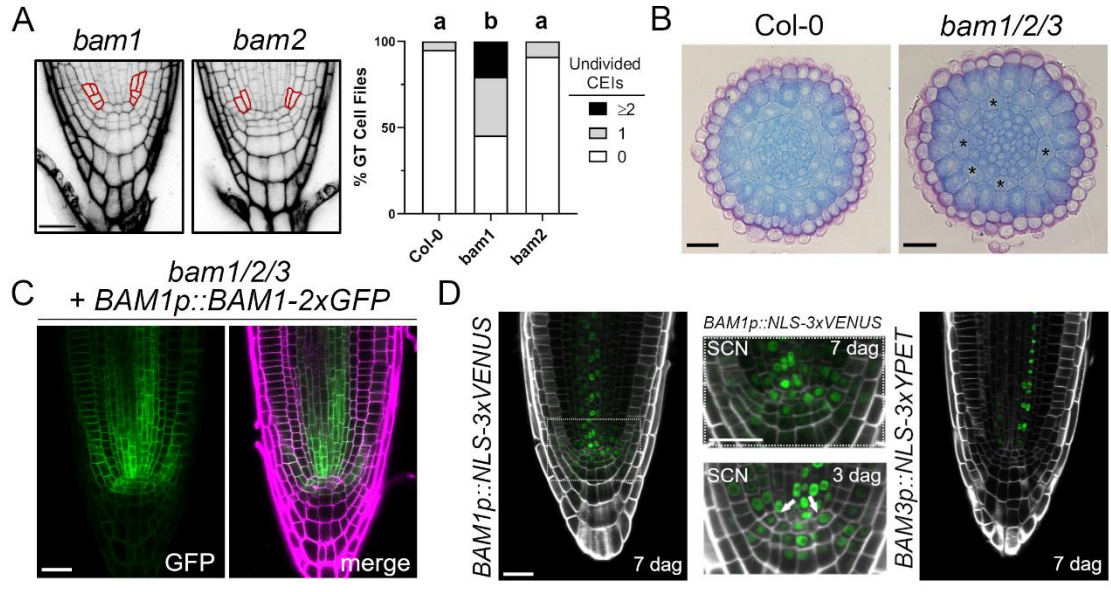

**Fig. S1.** BAM1/2 receptors are required for formative root cell divisions. (A) Quantification of undivided CEI cells in *bam1* and *bam2* single mutants (5 dag; n=81, Col-0; n= 56, *bam1*; n= 48, *bam2*). Undivided CEI cells and the first set of divisions are outlined in red. Distributions were compared using a Kruskal-Wallis nonparametric test. (B) Cross-sections of Col-0 and *bam1/2/3* roots at 6 dag. Asterisks represent a GT cell file with no formative division. (C) The division defects of a *bam1/2/3* mutant are rescued by the *BAM1p::BAM1-2xGFP* transgene. (D) The promoter of *BAM1* is active throughout the stem cell niche (SCN; boxed area), ground tissue (including CEIs at 3 dag, arrows), and stele in roots at 3 and 7 dag. (D) *BAM3* expression is restricted mainly to phloem lineage cells (D). Scale bars = 25  $\mu$ M (A-D).

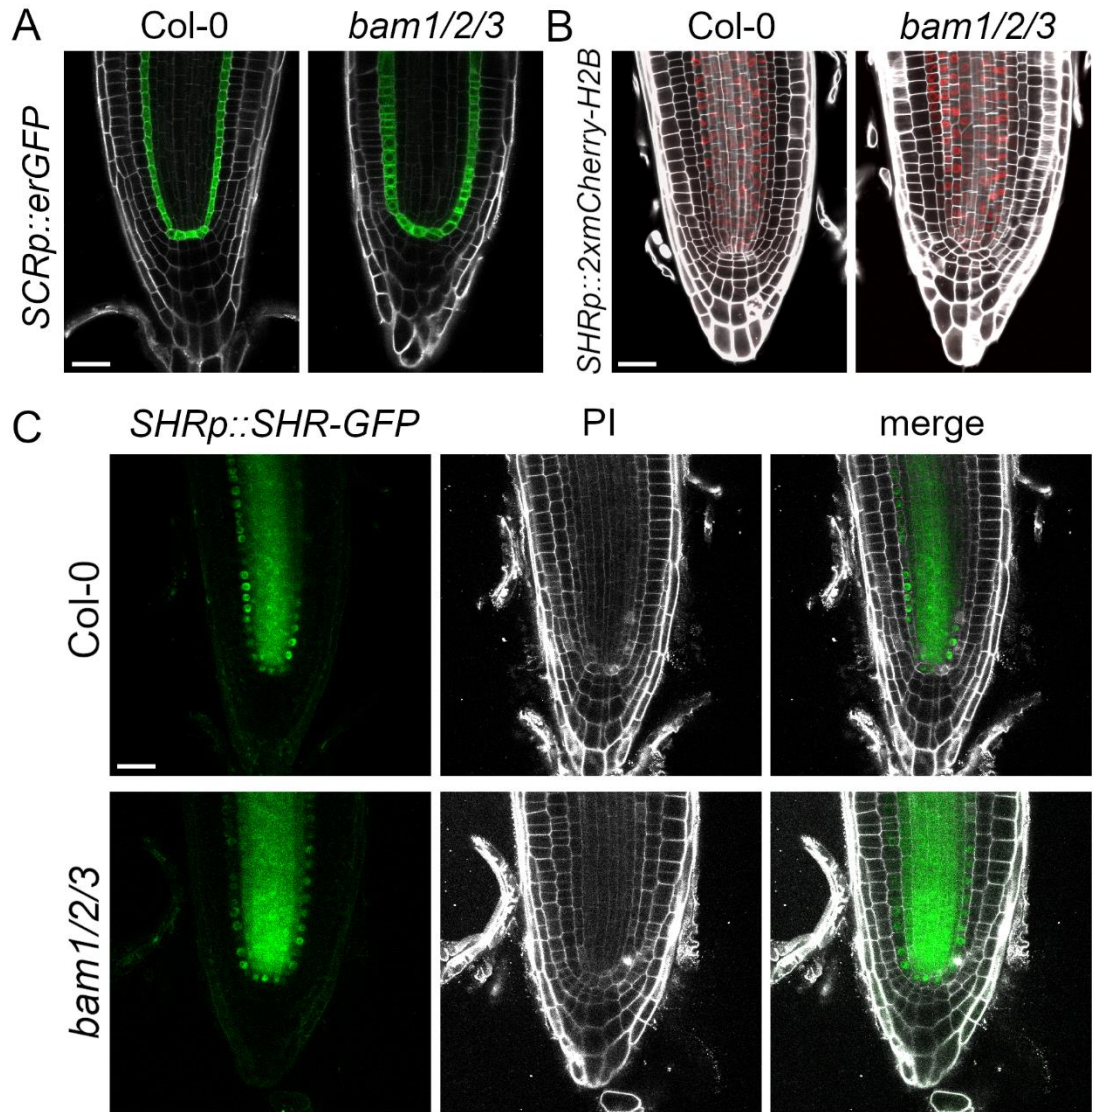

**Fig. S2.** BAM1/2 do not regulate *SHR* or *SCR* expression or protein dynamics. (A-B) Expression patterns of *SCR* (A; 7 dag) and *SHR* (B; 4 dag) were unchanged in *bam1/2/3* roots when compared to *Col-0* roots. (C) *SHR-GFP* was localized in the stele of *Col-0* and *bam1/2/3* and the subsequent trafficking into the ground tissue and nuclear sequestration was observed. Scale bar = 25 μm (A-C).

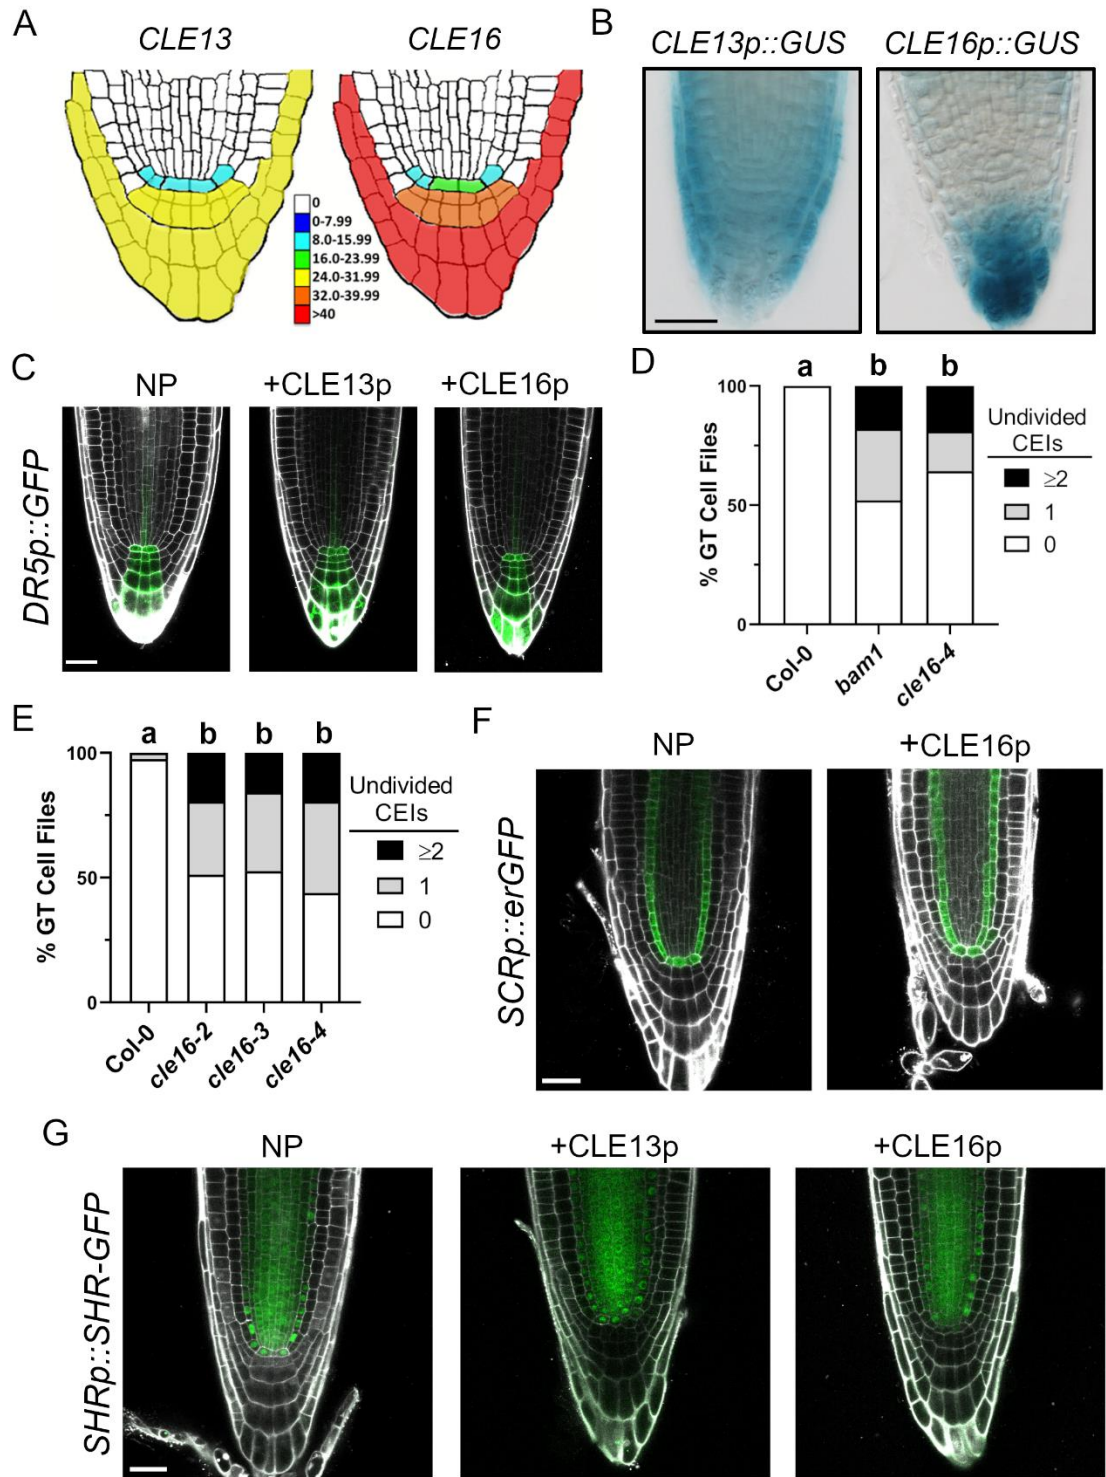

**Fig. S3.** Root enriched CLE genes regulate formative cell divisions. (A) Expression profiles of *CLE13* and *CLE16* by cell-type specific RNA-seq (1) (heatmap represents relative transcript abundance) and (B) *promoter::GUS* fusions in the root meristem. *CLE13* is largely expressed

throughout the stem cell niche, with *CLE16* expression is most prominent in columella and lateral root cap cells. (C) The expression pattern of *DR5p::GFP* does not change in response to peptide treatment in plants at 3 dag. (D) Undivided CEI quantification in the GT cell files of *bam1* and *cle16-4* (n= 32, Col-0; n= 50, *bam1*; n= 42, *cle16-4*) show similar division defects. (E) Three independent mutant alleles of *CLE16* display congruent phenotypes (n= 40, Col-0; n= 41, *cle16-2*; n= 38, *cle16-3*; n= 41, *cle16-4*). Distributions were compared using a Kruskal-Wallis nonparametric test. (F-G) Confocal imaging of roots expressing *SCRp::erGFP* (F) and *SHRp::SHR-GFP* (G) did not show altered patterns when treated with peptides. Scale bar = 25  $\mu$ m (B, C, F, and G).

**Table S1.** Locus ID, sequence, and *CYCLIND6;1p::GFP* response of synthesized root expressed CLE peptides.

| CLEp   | Locus ID  | Sequence     | # AA | Upregulation of <i>CYCD6</i> observed? |
|--------|-----------|--------------|------|----------------------------------------|
| CLE1p  | At1g73165 | RLSPGGPDPRHH | 12   | No                                     |
| CLE2p  | At4g18510 | RLSPGGPDPQHH | 12   | No                                     |
| CLE12p | At1g68795 | RRVPSGPNPLHH | 12   | Yes                                    |
| CLE13p | At1g73965 | RLVPSGPNPLHH | 12   | Yes                                    |
| CLE14p | At1g63245 | RLVPKGPNPLHN | 12   | n.d.                                   |
| CLE16p | At2g01505 | RLVHTGPNPLHN | 12   | Yes                                    |

<sup>n.d.</sup> not determined

**Table S2.** Locus ID and allele information for genotypes used in the study.

| <b>Genotype</b> | <b>Locus ID</b> | <b>Mutant allele</b>                               |
|-----------------|-----------------|----------------------------------------------------|
| <i>BAM1</i>     | At5g65700       | <i>bam1-4</i> , SALK_107290                        |
| <i>BAM2</i>     | At3g49670       | <i>bam2-4</i> , SAIL_1053_E09                      |
| <i>BAM3</i>     | At4g20270       | <i>bam3-2</i> , SALK_044433<br>SALK_004121         |
| <i>SHR</i>      | At4g37650       | <i>shr-2</i> , CS2972                              |
| <i>SCR</i>      | At3g54220       | <i>scr-3</i> , CS3997                              |
| <i>CLE16</i>    | At2g01505       | <i>cle16-2</i><br><i>cle16-3</i><br><i>cle16-4</i> |

**Table S3.** Primer sequences used for cloning and genotyping.

| Genotype                       |   | Primer sequence (5'-3')               | Notes                                                      |
|--------------------------------|---|---------------------------------------|------------------------------------------------------------|
| <i>BAM1</i>                    | F | ccggctactctttcccagatgtttctcatttacgtc  |                                                            |
|                                | R | cttattggaagagagatcgacgagatttagttacc   |                                                            |
| <i>bam1-4</i>                  | F | cttattggaagagagatcgacgagatttagttacc   |                                                            |
|                                | R | attttgccgatttcggaac                   | T-DNA LB primer (LB1.1a)                                   |
| <i>BAM2</i>                    | F | tatggttcgctttggtattg                  |                                                            |
|                                | R | gtagctcgttaccggaacc                   |                                                            |
| <i>bam2-4</i>                  | F | gaagtcagctgccagaaac                   |                                                            |
|                                | R | gcaccatcgtcaaccactac                  | detects BASTA <sup>r</sup>                                 |
| <i>BAM3</i>                    | F | ggtgaagataacacaacccttagccgcttccaacg   |                                                            |
|                                | R | ccggctactctttcccagatgtttctcatttacgtc  |                                                            |
| <i>bam3-2/<br/>SALK_004121</i> | F | ccggctactctttcccagatgtttctcatttacgtc  |                                                            |
|                                | R | attttgccgatttcggaac                   | T-DNA LB primer (LB1.1a)                                   |
| <i>SHR/shr-2</i>               | F | actcctccgctcttcgaatt                  |                                                            |
|                                | R | tctgtggctgcagctgttac                  | <i>shr-2</i> (large indel)                                 |
| <i>SCR/scr-3</i>               | F | tcaegggacttggtacttcc                  |                                                            |
|                                | R | cttctcgatggtcctccaac                  | CAPs; MaeII site is introduced in <i>scr-3</i>             |
| <i>CLE16/cle16-2</i>           | F | gaatccaaaacctgctctgc                  |                                                            |
|                                | R | cgaaggagcagtcacacct                   | MspI site at +59 is altered in <i>cle16-2</i> (+C)         |
| <i>CLE16/cle16-3</i>           | F | gaatccaaaacctgctctgc                  |                                                            |
|                                | R | cgaaggagcagtcacacct                   | MspI site at +59 is altered in <i>cle16-3</i> (-G)         |
| <i>CLE16/cle16-4</i>           | F | caaatcaaacagccatggaagctgttccagaaccaga |                                                            |
|                                | R | cttggagagagaccagacac                  | dCAPs; BseL1 site at +45 is altered in <i>cle16-4</i> (+A) |
| <i>CLE16p::CLE16</i>           |   | GGGGACAAGTTTGTACAAAAAAGCAG            | attB1- <i>CLE16</i>                                        |
|                                | F | GCTTCACCTatgcacttaaagtgtgtaacactg     | 5' promoter                                                |
|                                | R | GGGGACCACTTTGTACAAGAAAGCTG            | attB2- <i>CLE16</i> 3' UTR                                 |
|                                | R | GGTGgatcttcgaagaatccatgcattcg         |                                                            |



## SI References

1. Clark, N., *et al.* Stem-cell-ubiquitous genes spatiotemporally coordinate division through regulation of stem-cell-specific gene networks. *Nat. Commun.* **10**, 5574 (2019).
